# Supplementary material
Source: ML conference proceedings conference paper supplement (https://openaccess.thecvf.com/content/CVPR2023/html/Wang_Non-Line-of-Sight_Imaging_With_CVPR_2023_paper.html)
Supplement: Supplementary file 1 [file Wang_Non-Line-of-Sight_Imaging_With_CVPR_2023_supplemental.zip]

Archive with 2 entries (2 files):
- Dynamic scene.mp4
- supplement.pdf
